# Supplementary material
Source: MDPI journal article supplement (https://www.mdpi.com/1424-2818/16/4/245)
Supplement: s1 [file s1]

**Table S1** Sampling information of seawater samples from Korea and China

| Sampling Day   | Sampling Region |         | Sample ID        | Latitude (N) | Longitude (E) |
|----------------|-----------------|---------|------------------|--------------|---------------|
| 2022.12.01     | Wando, Korea    | Bogildo | WA1              | 34.139535    | 126.613365    |
| 11:00 to 12:00 |                 |         | WA2              |              |               |
|                |                 |         | WA3              |              |               |
|                |                 |         | WA4              |              |               |
|                |                 |         | WA5              |              |               |
| 2022.12.02     |                 |         | Rongcheng, China |              |               |
| 10:00 to 13:00 | AB2             |         |                  |              |               |
|                | AB3             |         |                  |              |               |
|                | AB4             |         |                  |              |               |
|                | AB5             |         |                  |              |               |
|                | Lidao Bay       | LB1     |                  | 37.339227    | 122.695365    |
|                |                 | LB2     |                  |              |               |
|                |                 | LB3     |                  |              |               |
|                |                 | LB4     |                  |              |               |

**Table S2** OTU and read number information of seawater samples.

| Sampling Region |            | Sample ID | Number of OTUs | Number of Reads |
|-----------------|------------|-----------|----------------|-----------------|
| Korea           | Wando      | WA1       | 6,538          | 277,959         |
|                 |            | WA2       | 5,470          | 221,079         |
|                 |            | WA3       | 6,962          | 295,589         |
|                 |            | WA4       | 5,306          | 174,590         |
|                 |            | WA5       | 7,414          | 243,435         |
| China           | Ailian Bay | AB1       | 5,445          | 300,016         |
|                 |            | AB2       | 6,275          | 328,607         |
|                 |            | AB3       | 5,196          | 255,847         |
|                 |            | AB4       | 4,530          | 169,736         |
|                 |            | AB5       | 6,023          | 293,355         |
|                 | Lidao Bay  | LB1       | 5,757          | 302,174         |
|                 |            | LB2       | 5,210          | 251,542         |
|                 |            | LB3       | 4,116          | 167,079         |
|                 |            | LB4       | 4,419          | 259,550         |

**Table S3** Result of taxonomic analysis of each sample classified into OTUs from Kingdom to Species level.  
(excel file)

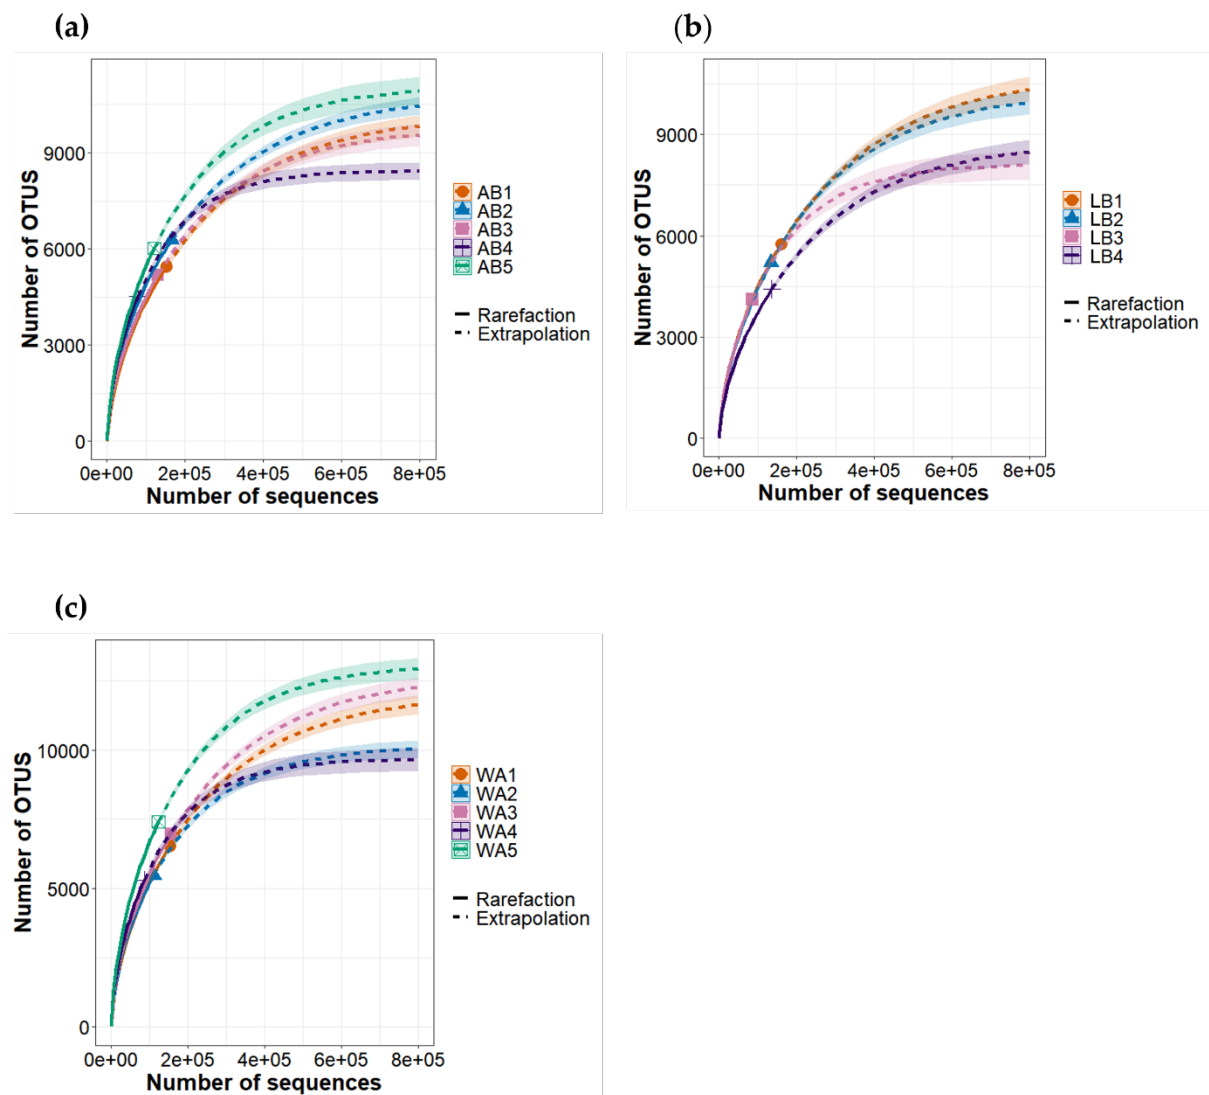

**Figure S1** Rarefaction and extrapolation curves of OTUs at 97% similarity for each seawater sample from **(a)** AB, **(b)** LB, and **(c)** WA.
